# Supplementary material
Source: PubMed Central journal article supplement (PMC1584273)
Supplement: pgen.0020143.st001.pdf [file pgen.0020143.st001.pdf]

[illegible]











[illegible]

[illegible]

|        |        |        |        |        |        |        |        |        |        |        |        |        |        |        |        |        |        |        |        |        |        |        |        |        |        |        |        |        |        |        |        |        |        |        |        |        |        |        |        |        |        |        |        |        |        |        |        |        |        |        |        |        |        |        |        |        |        |        |        |        |        |        |        |        |        |        |        |        |        |        |        |        |        |        |        |        |        |        |        |        |        |        |        |        |        |        |        |        |        |        |        |        |        |        |        |        |        |        |        |        |        |        |        |        |        |        |        |        |        |        |        |        |        |        |        |        |        |        |        |        |        |        |        |        |        |        |        |        |        |        |        |        |        |        |        |        |        |        |        |        |        |        |        |        |        |        |        |        |        |        |        |        |        |        |        |        |        |        |        |        |        |        |        |        |        |        |        |        |        |        |        |        |        |        |        |        |        |        |        |        |        |        |        |        |        |        |        |        |        |        |        |        |        |        |        |        |        |        |        |        |        |        |        |        |        |        |        |        |        |        |        |        |        |        |        |        |        |        |        |        |        |        |        |        |        |        |        |        |        |        |        |        |        |        |        |        |        |        |        |        |        |        |        |        |        |        |        |        |        |        |        |        |        |        |        |        |        |        |        |        |        |        |        |        |        |        |        |        |        |        |        |        |        |        |        |        |        |        |        |        |        |        |        |        |        |        |        |        |        |        |        |        |        |        |        |        |        |        |        |        |        |        |        |        |        |        |        |        |        |        |        |        |        |        |        |        |        |        |        |        |        |        |        |        |        |        |        |        |        |        |        |        |        |        |        |        |        |        |        |        |        |        |        |        |        |        |        |        |        |        |        |        |        |        |        |        |        |        |        |        |        |        |        |        |        |        |        |        |        |        |        |
|--------|--------|--------|--------|--------|--------|--------|--------|--------|--------|--------|--------|--------|--------|--------|--------|--------|--------|--------|--------|--------|--------|--------|--------|--------|--------|--------|--------|--------|--------|--------|--------|--------|--------|--------|--------|--------|--------|--------|--------|--------|--------|--------|--------|--------|--------|--------|--------|--------|--------|--------|--------|--------|--------|--------|--------|--------|--------|--------|--------|--------|--------|--------|--------|--------|--------|--------|--------|--------|--------|--------|--------|--------|--------|--------|--------|--------|--------|--------|--------|--------|--------|--------|--------|--------|--------|--------|--------|--------|--------|--------|--------|--------|--------|--------|--------|--------|--------|--------|--------|--------|--------|--------|--------|--------|--------|--------|--------|--------|--------|--------|--------|--------|--------|--------|--------|--------|--------|--------|--------|--------|--------|--------|--------|--------|--------|--------|--------|--------|--------|--------|--------|--------|--------|--------|--------|--------|--------|--------|--------|--------|--------|--------|--------|--------|--------|--------|--------|--------|--------|--------|--------|--------|--------|--------|--------|--------|--------|--------|--------|--------|--------|--------|--------|--------|--------|--------|--------|--------|--------|--------|--------|--------|--------|--------|--------|--------|--------|--------|--------|--------|--------|--------|--------|--------|--------|--------|--------|--------|--------|--------|--------|--------|--------|--------|--------|--------|--------|--------|--------|--------|--------|--------|--------|--------|--------|--------|--------|--------|--------|--------|--------|--------|--------|--------|--------|--------|--------|--------|--------|--------|--------|--------|--------|--------|--------|--------|--------|--------|--------|--------|--------|--------|--------|--------|--------|--------|--------|--------|--------|--------|--------|--------|--------|--------|--------|--------|--------|--------|--------|--------|--------|--------|--------|--------|--------|--------|--------|--------|--------|--------|--------|--------|--------|--------|--------|--------|--------|--------|--------|--------|--------|--------|--------|--------|--------|--------|--------|--------|--------|--------|--------|--------|--------|--------|--------|--------|--------|--------|--------|--------|--------|--------|--------|--------|--------|--------|--------|--------|--------|--------|--------|--------|--------|--------|--------|--------|--------|--------|--------|--------|--------|--------|--------|--------|--------|--------|--------|--------|--------|--------|--------|--------|--------|--------|--------|--------|--------|--------|--------|--------|--------|--------|--------|--------|--------|--------|--------|--------|--------|--------|--------|--------|--------|--------|--------|--------|--------|--------|--------|--------|--------|--------|--------|--------|--------|--------|--------|--------|--------|--------|--------|--------|--------|--------|--------|--------|--------|--------|--------|--------|--------|
| 148180 | 148181 | 148182 | 148183 | 148184 | 148185 | 148186 | 148187 | 148188 | 148189 | 148190 | 148191 | 148192 | 148193 | 148194 | 148195 | 148196 | 148197 | 148198 | 148199 | 148200 | 148201 | 148202 | 148203 | 148204 | 148205 | 148206 | 148207 | 148208 | 148209 | 148210 | 148211 | 148212 | 148213 | 148214 | 148215 | 148216 | 148217 | 148218 | 148219 | 148220 | 148221 | 148222 | 148223 | 148224 | 148225 | 148226 | 148227 | 148228 | 148229 | 148230 | 148231 | 148232 | 148233 | 148234 | 148235 | 148236 | 148237 | 148238 | 148239 | 148240 | 148241 | 148242 | 148243 | 148244 | 148245 | 148246 | 148247 | 148248 | 148249 | 148250 | 148251 | 148252 | 148253 | 148254 | 148255 | 148256 | 148257 | 148258 | 148259 | 148260 | 148261 | 148262 | 148263 | 148264 | 148265 | 148266 | 148267 | 148268 | 148269 | 148270 | 148271 | 148272 | 148273 | 148274 | 148275 | 148276 | 148277 | 148278 | 148279 | 148280 | 148281 | 148282 | 148283 | 148284 | 148285 | 148286 | 148287 | 148288 | 148289 | 148290 | 148291 | 148292 | 148293 | 148294 | 148295 | 148296 | 148297 | 148298 | 148299 | 148300 | 148301 | 148302 | 148303 | 148304 | 148305 | 148306 | 148307 | 148308 | 148309 | 148310 | 148311 | 148312 | 148313 | 148314 | 148315 | 148316 | 148317 | 148318 | 148319 | 148320 | 148321 | 148322 | 148323 | 148324 | 148325 | 148326 | 148327 | 148328 | 148329 | 148330 | 148331 | 148332 | 148333 | 148334 | 148335 | 148336 | 148337 | 148338 | 148339 | 148340 | 148341 | 148342 | 148343 | 148344 | 148345 | 148346 | 148347 | 148348 | 148349 | 148350 | 148351 | 148352 | 148353 | 148354 | 148355 | 148356 | 148357 | 148358 | 148359 | 148360 | 148361 | 148362 | 148363 | 148364 | 148365 | 148366 | 148367 | 148368 | 148369 | 148370 | 148371 | 148372 | 148373 | 148374 | 148375 | 148376 | 148377 | 148378 | 148379 | 148380 | 148381 | 148382 | 148383 | 148384 | 148385 | 148386 | 148387 | 148388 | 148389 | 148390 | 148391 | 148392 | 148393 | 148394 | 148395 | 148396 | 148397 | 148398 | 148399 | 148400 | 148401 | 148402 | 148403 | 148404 | 148405 | 148406 | 148407 | 148408 | 148409 | 148410 | 148411 | 148412 | 148413 | 148414 | 148415 | 148416 | 148417 | 148418 | 148419 | 148420 | 148421 | 148422 | 148423 | 148424 | 148425 | 148426 | 148427 | 148428 | 148429 | 148430 | 148431 | 148432 | 148433 | 148434 | 148435 | 148436 | 148437 | 148438 | 148439 | 148440 | 148441 | 148442 | 148443 | 148444 | 148445 | 148446 | 148447 | 148448 | 148449 | 148450 | 148451 | 148452 | 148453 | 148454 | 148455 | 148456 | 148457 | 148458 | 148459 | 148460 | 148461 | 148462 | 148463 | 148464 | 148465 | 148466 | 148467 | 148468 | 148469 | 148470 | 148471 | 148472 | 148473 | 148474 | 148475 | 148476 | 148477 | 148478 | 148479 | 148480 | 148481 | 148482 | 148483 | 148484 | 148485 | 148486 | 148487 | 148488 | 148489 | 148490 | 148491 | 148492 | 148493 | 148494 | 148495 | 148496 | 148497 | 148498 | 148499 | 148500 | 148501 | 148502 | 148503 | 148504 | 148505 | 148506 | 148507 | 148508 | 148509 | 148510 | 148511 | 148512 | 148513 | 148514 | 148515 | 148516 | 148517 | 148518 | 148519 | 148520 | 148521 | 148522 | 148523 | 148524 | 148525 | 148526 | 148527 | 148528 | 148529 | 148530 | 148531 | 148532 | 148533 | 148534 | 148535 | 148536 | 148537 | 148538 | 148539 | 148540 | 148541 | 148542 | 148543 | 148544 | 148545 | 148546 | 148547 | 148548 | 148549 | 148550 | 148551 |
|--------|--------|--------|--------|--------|--------|--------|--------|--------|--------|--------|--------|--------|--------|--------|--------|--------|--------|--------|--------|--------|--------|--------|--------|--------|--------|--------|--------|--------|--------|--------|--------|--------|--------|--------|--------|--------|--------|--------|--------|--------|--------|--------|--------|--------|--------|--------|--------|--------|--------|--------|--------|--------|--------|--------|--------|--------|--------|--------|--------|--------|--------|--------|--------|--------|--------|--------|--------|--------|--------|--------|--------|--------|--------|--------|--------|--------|--------|--------|--------|--------|--------|--------|--------|--------|--------|--------|--------|--------|--------|--------|--------|--------|--------|--------|--------|--------|--------|--------|--------|--------|--------|--------|--------|--------|--------|--------|--------|--------|--------|--------|--------|--------|--------|--------|--------|--------|--------|--------|--------|--------|--------|--------|--------|--------|--------|--------|--------|--------|--------|--------|--------|--------|--------|--------|--------|--------|--------|--------|--------|--------|--------|--------|--------|--------|--------|--------|--------|--------|--------|--------|--------|--------|--------|--------|--------|--------|--------|--------|--------|--------|--------|--------|--------|--------|--------|--------|--------|--------|--------|--------|--------|--------|--------|--------|--------|--------|--------|--------|--------|--------|--------|--------|--------|--------|--------|--------|--------|--------|--------|--------|--------|--------|--------|--------|--------|--------|--------|--------|--------|--------|--------|--------|--------|--------|--------|--------|--------|--------|--------|--------|--------|--------|--------|--------|--------|--------|--------|--------|--------|--------|--------|--------|--------|--------|--------|--------|--------|--------|--------|--------|--------|--------|--------|--------|--------|--------|--------|--------|--------|--------|--------|--------|--------|--------|--------|--------|--------|--------|--------|--------|--------|--------|--------|--------|--------|--------|--------|--------|--------|--------|--------|--------|--------|--------|--------|--------|--------|--------|--------|--------|--------|--------|--------|--------|--------|--------|--------|--------|--------|--------|--------|--------|--------|--------|--------|--------|--------|--------|--------|--------|--------|--------|--------|--------|--------|--------|--------|--------|--------|--------|--------|--------|--------|--------|--------|--------|--------|--------|--------|--------|--------|--------|--------|--------|--------|--------|--------|--------|--------|--------|--------|--------|--------|--------|--------|--------|--------|--------|--------|--------|--------|--------|--------|--------|--------|--------|--------|--------|--------|--------|--------|--------|--------|--------|--------|--------|--------|--------|--------|--------|--------|--------|--------|--------|--------|--------|--------|--------|--------|--------|--------|--------|--------|--------|--------|--------|--------|--------|--------|--------|--------|

[illegible]

[illegible]

|          |          |          |          |          |          |          |          |          |          |          |          |          |          |          |          |          |          |          |          |          |          |          |          |          |          |          |          |          |          |          |          |          |          |          |          |          |          |          |          |          |          |          |          |          |          |          |          |          |          |          |          |          |          |          |          |          |          |          |          |          |          |          |          |          |          |          |          |          |          |          |          |          |          |          |          |          |          |          |          |          |          |          |          |          |          |          |          |          |          |          |          |          |          |          |          |          |          |          |          |          |          |          |          |          |          |          |          |          |          |          |          |          |          |          |          |          |          |          |          |          |          |          |          |          |          |          |          |          |          |          |          |          |          |          |          |          |          |          |          |          |          |          |          |          |          |          |          |          |          |          |          |          |          |          |          |          |          |          |          |          |          |          |          |          |          |          |          |          |          |          |          |          |          |          |          |          |          |          |          |          |          |          |          |          |          |          |          |          |          |          |          |          |          |          |          |          |          |          |          |          |          |          |          |          |          |          |          |          |          |          |          |          |          |          |          |          |          |          |          |          |          |          |          |          |          |          |          |          |          |          |          |          |          |          |          |          |          |          |          |          |          |          |          |          |          |          |          |          |          |          |          |          |          |          |          |          |          |          |          |          |          |          |          |          |          |          |          |          |          |          |          |          |          |          |          |          |          |          |          |          |          |          |          |          |          |          |          |          |          |          |          |          |          |          |          |          |          |          |          |          |          |          |          |          |          |          |          |          |          |          |          |          |          |          |
|----------|----------|----------|----------|----------|----------|----------|----------|----------|----------|----------|----------|----------|----------|----------|----------|----------|----------|----------|----------|----------|----------|----------|----------|----------|----------|----------|----------|----------|----------|----------|----------|----------|----------|----------|----------|----------|----------|----------|----------|----------|----------|----------|----------|----------|----------|----------|----------|----------|----------|----------|----------|----------|----------|----------|----------|----------|----------|----------|----------|----------|----------|----------|----------|----------|----------|----------|----------|----------|----------|----------|----------|----------|----------|----------|----------|----------|----------|----------|----------|----------|----------|----------|----------|----------|----------|----------|----------|----------|----------|----------|----------|----------|----------|----------|----------|----------|----------|----------|----------|----------|----------|----------|----------|----------|----------|----------|----------|----------|----------|----------|----------|----------|----------|----------|----------|----------|----------|----------|----------|----------|----------|----------|----------|----------|----------|----------|----------|----------|----------|----------|----------|----------|----------|----------|----------|----------|----------|----------|----------|----------|----------|----------|----------|----------|----------|----------|----------|----------|----------|----------|----------|----------|----------|----------|----------|----------|----------|----------|----------|----------|----------|----------|----------|----------|----------|----------|----------|----------|----------|----------|----------|----------|----------|----------|----------|----------|----------|----------|----------|----------|----------|----------|----------|----------|----------|----------|----------|----------|----------|----------|----------|----------|----------|----------|----------|----------|----------|----------|----------|----------|----------|----------|----------|----------|----------|----------|----------|----------|----------|----------|----------|----------|----------|----------|----------|----------|----------|----------|----------|----------|----------|----------|----------|----------|----------|----------|----------|----------|----------|----------|----------|----------|----------|----------|----------|----------|----------|----------|----------|----------|----------|----------|----------|----------|----------|----------|----------|----------|----------|----------|----------|----------|----------|----------|----------|----------|----------|----------|----------|----------|----------|----------|----------|----------|----------|----------|----------|----------|----------|----------|----------|----------|----------|----------|----------|----------|----------|----------|----------|----------|----------|----------|----------|----------|----------|----------|----------|----------|----------|----------|----------|----------|----------|----------|----------|----------|----------|----------|----------|----------|----------|----------|----------|----------|----------|----------|----------|----------|----------|----------|----------|----------|----------|----------|
| 18170827 | 18170828 | 18170829 | 18170830 | 18170831 | 18170832 | 18170833 | 18170834 | 18170835 | 18170836 | 18170837 | 18170838 | 18170839 | 18170840 | 18170841 | 18170842 | 18170843 | 18170844 | 18170845 | 18170846 | 18170847 | 18170848 | 18170849 | 18170850 | 18170851 | 18170852 | 18170853 | 18170854 | 18170855 | 18170856 | 18170857 | 18170858 | 18170859 | 18170860 | 18170861 | 18170862 | 18170863 | 18170864 | 18170865 | 18170866 | 18170867 | 18170868 | 18170869 | 18170870 | 18170871 | 18170872 | 18170873 | 18170874 | 18170875 | 18170876 | 18170877 | 18170878 | 18170879 | 18170880 | 18170881 | 18170882 | 18170883 | 18170884 | 18170885 | 18170886 | 18170887 | 18170888 | 18170889 | 18170890 | 18170891 | 18170892 | 18170893 | 18170894 | 18170895 | 18170896 | 18170897 | 18170898 | 18170899 | 18170900 | 18170901 | 18170902 | 18170903 | 18170904 | 18170905 | 18170906 | 18170907 | 18170908 | 18170909 | 18170910 | 18170911 | 18170912 | 18170913 | 18170914 | 18170915 | 18170916 | 18170917 | 18170918 | 18170919 | 18170920 | 18170921 | 18170922 | 18170923 | 18170924 | 18170925 | 18170926 | 18170927 | 18170928 | 18170929 | 18170930 | 18170931 | 18170932 | 18170933 | 18170934 | 18170935 | 18170936 | 18170937 | 18170938 | 18170939 | 18170940 | 18170941 | 18170942 | 18170943 | 18170944 | 18170945 | 18170946 | 18170947 | 18170948 | 18170949 | 18170950 | 18170951 | 18170952 | 18170953 | 18170954 | 18170955 | 18170956 | 18170957 | 18170958 | 18170959 | 18170960 | 18170961 | 18170962 | 18170963 | 18170964 | 18170965 | 18170966 | 18170967 | 18170968 | 18170969 | 18170970 | 18170971 | 18170972 | 18170973 | 18170974 | 18170975 | 18170976 | 18170977 | 18170978 | 18170979 | 18170980 | 18170981 | 18170982 | 18170983 | 18170984 | 18170985 | 18170986 | 18170987 | 18170988 | 18170989 | 18170990 | 18170991 | 18170992 | 18170993 | 18170994 | 18170995 | 18170996 | 18170997 | 18170998 | 18170999 | 18171000 | 18171001 | 18171002 | 18171003 | 18171004 | 18171005 | 18171006 | 18171007 | 18171008 | 18171009 | 18171010 | 18171011 | 18171012 | 18171013 | 18171014 | 18171015 | 18171016 | 18171017 | 18171018 | 18171019 | 18171020 | 18171021 | 18171022 | 18171023 | 18171024 | 18171025 | 18171026 | 18171027 | 18171028 | 18171029 | 18171030 | 18171031 | 18171032 | 18171033 | 18171034 | 18171035 | 18171036 | 18171037 | 18171038 | 18171039 | 18171040 | 18171041 | 18171042 | 18171043 | 18171044 | 18171045 | 18171046 | 18171047 | 18171048 | 18171049 | 18171050 | 18171051 | 18171052 | 18171053 | 18171054 | 18171055 | 18171056 | 18171057 | 18171058 | 18171059 | 18171060 | 18171061 | 18171062 | 18171063 | 18171064 | 18171065 | 18171066 | 18171067 | 18171068 | 18171069 | 18171070 | 18171071 | 18171072 | 18171073 | 18171074 | 18171075 | 18171076 | 18171077 | 18171078 | 18171079 | 18171080 | 18171081 | 18171082 | 18171083 | 18171084 | 18171085 | 18171086 | 18171087 | 18171088 | 18171089 | 18171090 | 18171091 | 18171092 | 18171093 | 18171094 | 18171095 | 18171096 | 18171097 | 18171098 | 18171099 | 18171100 | 18171101 | 18171102 | 18171103 | 18171104 | 18171105 | 18171106 | 18171107 | 18171108 | 18171109 | 18171110 | 18171111 | 18171112 | 18171113 | 18171114 | 18171115 | 18171116 | 18171117 | 18171118 | 18171119 | 18171120 | 18171121 | 18171122 | 18171123 | 18171124 | 18171125 | 18171126 | 18171127 | 18171128 | 18171129 | 18171130 | 18171131 | 18171132 | 18171133 | 18171134 | 18171135 | 18171136 | 18171137 | 18171138 | 18171139 | 18171140 | 18171141 |
|----------|----------|----------|----------|----------|----------|----------|----------|----------|----------|----------|----------|----------|----------|----------|----------|----------|----------|----------|----------|----------|----------|----------|----------|----------|----------|----------|----------|----------|----------|----------|----------|----------|----------|----------|----------|----------|----------|----------|----------|----------|----------|----------|----------|----------|----------|----------|----------|----------|----------|----------|----------|----------|----------|----------|----------|----------|----------|----------|----------|----------|----------|----------|----------|----------|----------|----------|----------|----------|----------|----------|----------|----------|----------|----------|----------|----------|----------|----------|----------|----------|----------|----------|----------|----------|----------|----------|----------|----------|----------|----------|----------|----------|----------|----------|----------|----------|----------|----------|----------|----------|----------|----------|----------|----------|----------|----------|----------|----------|----------|----------|----------|----------|----------|----------|----------|----------|----------|----------|----------|----------|----------|----------|----------|----------|----------|----------|----------|----------|----------|----------|----------|----------|----------|----------|----------|----------|----------|----------|----------|----------|----------|----------|----------|----------|----------|----------|----------|----------|----------|----------|----------|----------|----------|----------|----------|----------|----------|----------|----------|----------|----------|----------|----------|----------|----------|----------|----------|----------|----------|----------|----------|----------|----------|----------|----------|----------|----------|----------|----------|----------|----------|----------|----------|----------|----------|----------|----------|----------|----------|----------|----------|----------|----------|----------|----------|----------|----------|----------|----------|----------|----------|----------|----------|----------|----------|----------|----------|----------|----------|----------|----------|----------|----------|----------|----------|----------|----------|----------|----------|----------|----------|----------|----------|----------|----------|----------|----------|----------|----------|----------|----------|----------|----------|----------|----------|----------|----------|----------|----------|----------|----------|----------|----------|----------|----------|----------|----------|----------|----------|----------|----------|----------|----------|----------|----------|----------|----------|----------|----------|----------|----------|----------|----------|----------|----------|----------|----------|----------|----------|----------|----------|----------|----------|----------|----------|----------|----------|----------|----------|----------|----------|----------|----------|----------|----------|----------|----------|----------|----------|----------|----------|----------|----------|----------|----------|----------|----------|----------|----------|----------|----------|----------|----------|----------|----------|----------|----------|----------|----------|----------|----------|----------|----------|----------|





[illegible]









[illegible]
